# Supplementary material for: Epigenetic Clock Explains White Matter Hyperintensity Burden Irrespective of Chronological Age
Source: MDPI journal article supplement (doi:10.3390/biology12010033), 2022-12-24
Supplement: s1 [file s1]

**Supplementary Table S1:** Effects of main covariables on Log-WMH

| Variable                       |                         | r/mean(SD)  | p-value |
|--------------------------------|-------------------------|-------------|---------|
| Age                            |                         | 0.392       | <0.001  |
| Sex                            |                         |             |         |
|                                | Female                  | 2.08 (1.07) | 0.247   |
|                                | Male                    | 2.24 (1.09) |         |
| Smoking habit                  |                         |             |         |
|                                | No                      | 2.29 (1.03) | 0.03    |
|                                | Yes                     | 1.97 (1.16) |         |
| Alcohol consumption            |                         |             |         |
|                                | No                      | 2.29 (1.05) | 0.01    |
|                                | Yes                     | 1.89 (1.13) |         |
| Hypertension                   |                         |             |         |
|                                | No                      | 1.78 (1.19) | 0.002   |
|                                | Yes                     | 2.3 (1.03)  |         |
| Diabetes                       |                         |             |         |
|                                | No                      | 2.03 (1.11) | 0.011   |
|                                | Yes                     | 2.39 (1.01) |         |
| Dyslipidemia                   |                         |             |         |
|                                | No                      | 2.12 (1.06) | 0.466   |
|                                | Yes                     | 2.22 (1.1)  |         |
| Body mass index                |                         | -0.084      | 0.203   |
| Atrial fibrillation            |                         |             |         |
|                                | No                      | 2.2 (1.1)   | 0.657   |
|                                | Yes                     | 2.13 (1.04) |         |
| Previous myocardial infarction |                         |             |         |
|                                | No                      | 2.17 (1.09) | 0.740   |
|                                | Yes                     | 2.25 (1.03) |         |
| TOAST                          |                         |             |         |
|                                | <i>Atherothrombotic</i> | 2.07 (1.03) | 0.117   |
|                                | <i>Lacunar</i>          | 2.34 (1.12) |         |
|                                | <i>Cardioembolic</i>    | 1.99 (1.01) |         |
|                                | <i>Undetermined</i>     | 2.29 (1.16) |         |

Each row represents the association between an explanatory variable and log WMH. Values represent Pearson correlation coefficient for continuous variables and mean (SD) for categorical variables (second column). The third column represents the significance in correlations or differences between groups, and *p*-values have been obtained with Pearson correlation coefficient, *t*- or anova-tests according to the type of each variable.
